# Supplementary material for: Movement Patterns of Roaming Companion Cats in Denmark—A Study Based on GPS Tracking
Source: Animals (Basel). 2022 Jul 7;12(14):1748. doi: 10.3390/ani12141748 (PMC9311815; doi:10.3390/ani12141748)
Supplement: Supplementary file 1 [file animals-12-01748-s001.zip › Dataset (Supplementary S2).xlsx]

## Sheet: Questionnaire data and areas
Cat ID	Age	Sex	Breed	Type of outdoor access	Restrictions day/night	Ad libitum access to feed	Nature	Busy road	Area	Municipality	Region
Cat 01	7 years	A neutered male	Domestic shorthair	Indoor cat with outdoor access via cat flap	The cat is able to go outside and inside as it pleases at all hours day and night	Yes	Yes	Yes	Suburban	Gribskov	Capital Region of Denmark
Cat 02	1 year	A neutered female	Domestic shorthair	Indoor cat with outdoor access via cat flap	The cat is able to go outside and inside as it pleases at all hours day and night	Yes	Yes	Yes	Suburban	Gribskov	Capital Region of Denmark
Cat 03	2 years	A neutered male	Domestic shorthair	Indoor cat with outdoor access via window or door	The cat is able to go outside and inside as it pleases at all hours day and night	Yes	Yes	Yes	Cottage	Gribskov	Capital Region of Denmark
Cat 04	8 years	A neutered male	Mixed breed	Indoor cat with outdoor access via cat flap	The cat is able to go outside and inside as it pleases at all hours day and night	No	Yes	Yes	Cottage	Gribskov	Capital Region of Denmark
Cat 05	3 years	A neutered male	Bengal	Indoor cat with outdoor access via cat flap	The cat is able to go outside and inside as it pleases at all hours day and night	Yes	Yes	Yes	Cottage	Gribskov	Capital Region of Denmark
Cat 06	4 years	A neutered female	Domestic shorthair	Indoor cat with outdoor access via cat flap	The cat is able to go outside and inside as it pleases at all hours day and night	Yes	Yes	No	Cottage	Gribskov	Capital Region of Denmark
Cat 07	3 years	A neutered female	Mixed breed	Indoor cat with outdoor access via cat flap	The cat is able to go outside and inside as it pleases at all hours day and night	Yes	Yes	Yes	Cottage	Gribskov	Capital Region of Denmark
Cat 08	3 years	A neutered female	Mixed breed	Indoor cat with outdoor access via cat flap	The cat is able to go outside and inside as it pleases at all hours day and night	Yes	Yes	Yes	Cottage	Gribskov	Capital Region of Denmark
Cat 09	2 years	A neutered female	Domestic shorthair	Indoor cat with outdoor access via cat flap	The cat is able to go outside and inside as it pleases at all hours day and night	Yes	Yes	Yes	Rural	Gribskov	Capital Region of Denmark
Cat 10	9 years	A neutered male	Birman	Indoor cat with outdoor access via window or door	The cat is typically let out during the day and is indoors at night	Yes	Yes	No	Rural	Stevns	Region Zealand
Cat 11	12 years	A neutered female	Domestic shorthair	Indoor cat with outdoor access via cat flap	The cat is able to go outside and inside as it pleases at all hours day and night	Yes	Yes	Yes	Industry	Gribskov	Capital Region of Denmark
Cat 12	13 years	A neutered male	Domestic shorthair	Indoor cat with outdoor access via cat flap	The cat is able to go outside and inside as it pleases at all hours day and night	Yes	Yes	Yes	Industry	Gribskov	Capital Region of Denmark
Cat 13	3 years	A neutered female	Domestic shorthair	Indoor cat with outdoor access via window or door	The cat is typically let out during the day and is indoors at night	No	Yes	No	Rural	Gribskov	Capital Region of Denmark
Cat 14	13 years	A neutered male	Norwegian Forest cat	Indoor cat with outdoor access via cat flap	The cat is able to go outside and inside as it pleases at all hours day and night	Yes	No	Yes	Urban	Rødovre	Capital Region of Denmark
Cat 15	9 years	A neutered female	Mixed breed	Indoor cat with outdoor access via cat flap	The cat is able to go outside and inside as it pleases at all hours day and night	Yes	No	Yes	Urban	Rødovre	Capital Region of Denmark
Cat 16	8 years	A neutered male	Mixed breed	Indoor cat with outdoor access via cat flap	The cat is able to go outside and inside as it pleases at all hours day and night	Yes	Yes	No	Cottage	Gribskov	Capital Region of Denmark
Cat 17	4 years	A neutered female	Other purebred cat	Indoor cat with outdoor access via window or door	The cat is able to go outside and inside as it pleases at all hours day and night	Yes	No	No	Industry	Gribskov	Capital Region of Denmark
Cat 18	7 years	A neutered male	Mixed breed	Indoor cat with outdoor access via cat flap	The cat is able to go outside and inside as it pleases at all hours day and night	Yes	No	Yes	Urban	København	Capital Region of Denmark
Cat 19	2 years	An intact male	Domestic shorthair	Outdoor cat or farm cat which is rarely or never indoors		Yes	Yes	No	Rural	Furesø	Capital Region of Denmark
Cat 20	4 years	A neutered female	Domestic shorthair	Indoor cat with outdoor access via window or door	The cat is able to go outside and inside as it pleases at all hours day and night	No	Yes	Yes	Rural	Thisted	North Denmark Region
Cat 21	7 years	A neutered male	Domestic shorthair	Indoor cat with outdoor access via window or door	The cat is typically let out during the day and is indoors at night	Yes	Yes	No	Suburban	Greve	Region Zealand
Cat 22	12 years	A neutered female	Domestic shorthair	Indoor cat with outdoor access via window or door	The cat is typically let out at night and is indoors during the day	Yes	Yes	No	Rural	Furesø	Capital Region of Denmark
Cat 23	12 years	A neutered female	Mixed breed	Indoor cat with outdoor access via window or door	The cat is typically let out at night and is indoors during the day	Yes	No	Yes	Suburban	Horsens	Central Denmark Region
Cat 24	10 years	A neutered male	Domestic shorthair	Outdoor cat or farm cat which is rarely or never indoors		No	Yes	No	Rural	Halsnæs	Capital Region of Denmark
Cat 25	4 years	A neutered male	Domestic shorthair	Indoor cat with outdoor access via window or door	The cat is able to go outside and inside as it pleases at all hours day and night	Yes	Yes	Yes	Rural	Sønderborg	Region of Southern Denmark
Cat 26	1 year	An intact male	Domestic shorthair	Outdoor cat or farm cat which is rarely or never indoors		Yes	Yes	No	Rural	Viborg	Central Denmark Region
Cat 27	4 years	A neutered female	Domestic shorthair	Indoor cat with outdoor access via window or door	The cat is able to go outside and inside as it pleases at all hours day and night	No	Yes	No	Rural	Næstved	Region Zealand
Cat 28	13 years	A neutered male	Mixed breed	Indoor cat with outdoor access via cat flap	The cat is able to go outside and inside as it pleases at all hours day and night	Yes	Yes	No	Suburban	Albertslund	Capital Region of Denmark
Cat 29	12 years	A neutered female	Domestic shorthair	Indoor cat with outdoor access via window or door	The cat is typically let out during the day and is indoors at night	Yes	No	Yes	Urban	København	Capital Region of Denmark
Cat 30	5 years	A neutered male	Domestic shorthair	Indoor cat with outdoor access via cat flap	The cat is able to go outside and inside as it pleases at all hours day and night	Yes	Yes	No	Suburban	Esbjerg	Region of Southern Denmark
Cat 31	4 years	A neutered female	Domestic shorthair	Indoor cat with outdoor access via window or door	The cat is typically let out during the day and is indoors at night	No	Yes	Yes	Suburban	Ballerup	Capital Region of Denmark
Cat 32	11 years	A neutered male	Domestic shorthair	Indoor cat with outdoor access via cat flap	The cat is able to go outside and inside as it pleases at all hours day and night	Yes	Yes	Yes	Suburban	Fredensborg	Capital Region of Denmark
Cat 33	10 years	A neutered male	Mixed breed	Indoor cat with outdoor access via window or door	The cat is typically let out at night and is indoors during the day	Yes	Yes	No	Rural	Roskilde	Region Zealand
Cat 34	10 years	A neutered female	Domestic shorthair	Indoor cat with outdoor access via window or door	The cat is able to go outside and inside as it pleases at all hours day and night	Yes	No	Yes	Suburban	Ballerup	Capital Region of Denmark
Cat 35	1 year	A neutered male	Do not know	Indoor cat with outdoor access via window or door	The cat is able to go outside and inside as it pleases at all hours day and night	No	Yes	No	Rural	Faxe	Region Zealand
Cat 36	8 years	A neutered male	Mixed breed	Indoor cat with outdoor access via cat flap	The cat is able to go outside and inside as it pleases at all hours day and night	Yes	Yes	No	Suburban	Rudersdal	Capital Region of Denmark
Cat 37	16 years	A neutered female	Mixed breed	Indoor cat with outdoor access via cat flap	The cat is able to go outside and inside as it pleases at all hours day and night	Yes	Yes	Yes	Suburban	Rudersdal	Capital Region of Denmark
Cat 38	9 years	A neutered male	Domestic shorthair	Indoor cat with outdoor access via window or door	The cat is typically let out at night and is indoors during the day	Yes	Yes	Yes	Suburban	Aarhus	Central Denmark Region
Cat 39	10 years	A neutered male	Domestic shorthair	Indoor cat with outdoor access via cat flap	The cat is able to go outside and inside as it pleases at all hours day and night	Yes	Yes	No	Rural	Gribskov	Capital Region of Denmark
Cat 40	12 years	A neutered male	Domestic shorthair	Indoor cat with outdoor access via cat flap	The cat is able to go outside and inside as it pleases at all hours day and night	Yes	Yes	Yes	Suburban	Kolding	Region of Southern Denmark
Cat 41	5 years	A neutered female	Domestic shorthair	Indoor cat with outdoor access via window or door	The cat is able to go outside and inside as it pleases at all hours day and night	Yes	Yes	No	Rural	Slagelse	Region Zealand
Cat 42	4 years	A neutered male	Mixed breed	Indoor cat with outdoor access via window or door	The cat is typically let out at night and is indoors during the day	No	Yes	Yes	Rural	Næstved	Region Zealand
Cat 43	1 year	An intact female	Ragdoll	Indoor cat with outdoor access via window or door	The cat is typically let out during the day and is indoors at night	No	No	Yes	Suburban	Egedal	Capital Region of Denmark
Cat 44	6 years	A neutered male	Domestic shorthair	Outdoor cat or farm cat which is rarely or never indoors		Yes	Yes	Yes	Suburban	Gribskov	Capital Region of Denmark
Cat 45	5 years	A neutered female	Domestic shorthair	Indoor cat with outdoor access via cat flap	The cat is able to go outside and inside as it pleases at all hours day and night	Yes	No	Yes	Urban	København	Capital Region of Denmark
Cat 46	6 years	A neutered male	Maine Coon	Indoor cat with outdoor access via cat flap	The cat is able to go outside and inside as it pleases at all hours day and night	Yes	Yes	No	Suburban	Køge	Region Zealand
Cat 47	2 years	A neutered female	Mixed breed	Indoor cat with outdoor access via cat flap	The cat is typically let out during the day and is indoors at night	Yes	Yes	No	Suburban	Roskilde	Region Zealand
Cat 48	3 years	A neutered male	Ragdoll	Indoor cat with outdoor access via window or door	The cat is typically let out during the day and is indoors at night	Yes	Yes	Yes	Suburban	Faxe	Region Zealand
Cat 49	2 years	A neutered female	Domestic shorthair	Indoor cat with outdoor access via window or door	The cat is able to go outside and inside as it pleases at all hours day and night	Yes	Yes	Yes	Industry	Aarhus	Central Denmark Region
Cat 50	15 years	A neutered male	Domestic shorthair	Indoor cat with outdoor access via window or door	The cat is typically let out at night and is indoors during the day	No	No	Yes	Suburban	Gentofte	Capital Region of Denmark
Cat 51	4 years	A neutered female	Domestic shorthair	Indoor cat with outdoor access via window or door	The cat is typically let out at night and is indoors during the day	Yes	Yes	No	Rural	Aabenraa	Region of Southern Denmark
Cat 52	4 years	A neutered female	Domestic shorthair	Indoor cat with outdoor access via window or door	The cat is typically let out at night and is indoors during the day	Yes	Yes	No	Rural	Aabenraa	Region of Southern Denmark
Cat 53	3 years	A neutered male	Domestic shorthair	Indoor cat with outdoor access via cat flap	The cat is able to go outside and inside as it pleases at all hours day and night	Yes	Yes	No	Suburban	Herning	Central Denmark Region
Cat 54	2 years	A neutered male	Domestic shorthair	Indoor cat with outdoor access via cat flap	The cat is able to go outside and inside as it pleases at all hours day and night	Yes	Yes	No	Suburban	Herning	Central Denmark Region
Cat 55	4 years	A neutered female	Domestic shorthair	Indoor cat with outdoor access via cat flap	The cat is able to go outside and inside as it pleases at all hours day and night	Yes	Yes	No	Suburban	Herning	Central Denmark Region
Cat 56	3 years	A neutered male	Domestic shorthair	Indoor cat with outdoor access via cat flap	The cat is able to go outside and inside as it pleases at all hours day and night	Yes	Yes	Yes	Suburban	Slagelse	Region Zealand
Cat 57	1 year	A neutered male	Domestic shorthair	Indoor cat with outdoor access via cat flap	The cat is able to go outside and inside as it pleases at all hours day and night	Yes	Yes	Yes	Suburban	Slagelse	Region Zealand
Cat 58	9 years	A neutered female	Domestic shorthair	Indoor cat with outdoor access via window or door	The cat is able to go outside and inside as it pleases at all hours day and night	Yes	Yes	Yes	Suburban	Guldborgsund	Region Zealand
Cat 59	5 years	A neutered female	Mixed breed	Indoor cat with outdoor access via cat flap	The cat is able to go outside and inside as it pleases at all hours day and night	Yes	Yes	No	Suburban	Brønderslev	North Denmark Region
Cat 60	2 years	A neutered female	Do not know	Indoor cat with outdoor access via cat flap	The cat is able to go outside and inside as it pleases at all hours day and night	Yes	Yes	No	Suburban	Brønderslev	North Denmark Region
Cat 61	9 years	A neutered male	Other purebred cat	Indoor cat with outdoor access via window or door	The cat is typically let out during the day and is indoors at night	Yes	No	Yes	Urban	København	Central Denmark Region
Cat 62	12 years	A neutered female	Domestic shorthair	Indoor cat with outdoor access via window or door	The cat is typically let out at night and is indoors during the day	Yes	Yes	Yes	Rural	Sønderborg	Region of Southern Denmark
Cat 63	7 years	A neutered female	Domestic shorthair	Indoor cat with outdoor access via window or door	The cat is typically let out at night and is indoors during the day	Yes	Yes	Yes	Rural	Sønderborg	Region of Southern Denmark
Cat 64	8 years	A neutered female	Domestic shorthair	Outdoor cat or farm cat which is rarely or never indoors		Yes	Yes	Yes	Rural	Sønderborg	Region of Southern Denmark
Cat 65	9 years	A neutered female	Russian Blue	Indoor cat with outdoor access via window or door	The cat is typically let out during the day and is indoors at night	Yes	No	Yes	Suburban	København	Capital Region of Denmark
Cat 66	3 years	A neutered female	Russian Blue	Indoor cat with outdoor access via window or door	The cat is typically let out during the day and is indoors at night	Yes	No	Yes	Suburban	København	Capital Region of Denmark
Cat 67	3 years	A neutered male	Russian Blue	Indoor cat with outdoor access via window or door	The cat is typically let out during the day and is indoors at night	Yes	No	Yes	Suburban	København	Capital Region of Denmark
Cat 68	1 year	A neutered male	Domestic shorthair	Indoor cat with outdoor access via window or door	The cat is typically let out during the day and is indoors at night	Yes	Yes	No	Industry	Lolland	Region Zealand
Cat 69	1 year	A neutered female	Domestic shorthair	Indoor cat with outdoor access via window or door	The cat is typically let out during the day and is indoors at night	Yes	Yes	No	Industry	Lolland	Region Zealand
Cat 70	10 years	A neutered female	Domestic shorthair	Indoor cat with outdoor access via cat flap	The cat is able to go outside and inside as it pleases at all hours day and night	Yes	No	No	Suburban	Aarhus	Central Denmark Region
Cat 71	1 year	A neutered female	Domestic shorthair	Indoor cat with outdoor access via window or door	The cat is typically let out at night and is indoors during the day	Yes	Yes	No	Rural	Vejle	Region of Southern Denmark
Cat 72	1 year	A neutered female	Domestic shorthair	Indoor cat with outdoor access via cat flap	The cat is able to go outside and inside as it pleases at all hours day and night	Yes	Yes	No	Suburban	Aarhus	Central Denmark Region
Cat 73	9 years	A neutered male	Maine Coon	Indoor cat with outdoor access via cat flap	The cat is able to go outside and inside as it pleases at all hours day and night	Yes	Yes	No	Suburban	Køge	Region Zealand
Cat 74	11 years	A neutered male	Mixed breed	Indoor cat with outdoor access via cat flap	The cat is able to go outside and inside as it pleases at all hours day and night	No	No	Yes	Suburban	København	Capital Region of Denmark
Cat 75	4 years	An intact male	Domestic shorthair	Outdoor cat or farm cat which is rarely or never indoors		Yes	Yes	No	Rural	Aabenraa	Region of Southern Denmark
Cat 76	4 years	An intact male	Domestic shorthair	Outdoor cat or farm cat which is rarely or never indoors		Yes	Yes	No	Rural	Aabenraa	Region of Southern Denmark
Cat 77	1 year	A neutered female	Domestic shorthair	Indoor cat with outdoor access via window or door	The cat is typically let out at night and is indoors during the day	Yes	Yes	No	Rural	Vejle	Region of Southern Denmark
Cat 78	1 year	A neutered female	Maine Coon	Indoor cat with outdoor access via cat flap	The cat is able to go outside and inside as it pleases at all hours day and night	Yes	Yes	Yes	Rural	Kalundborg	Region Zealand
Cat 79	2 years	A neutered male	Mixed breed	Indoor cat with outdoor access via window or door	The cat is typically let out at night and is indoors during the day	Yes	Yes	Yes	Suburban	Køge	Region Zealand
Cat 80	8 years	A neutered male	Maine Coon	Indoor cat with outdoor access via cat flap	The cat is able to go outside and inside as it pleases at all hours day and night	Yes	Yes	No	Suburban	Køge	Region Zealand
Cat 81	5 years	A neutered male	Domestic shorthair	Indoor cat with outdoor access via cat flap	The cat is able to go outside and inside as it pleases at all hours day and night	No	Yes	No	Suburban	Næstved	Region Zealand
Cat 82	6 years	A neutered female	Domestic shorthair	Indoor cat with outdoor access via cat flap	The cat is able to go outside and inside as it pleases at all hours day and night	No	Yes	No	Suburban	Næstved	Region Zealand
Cat 83	6 years	A neutered female	Domestic shorthair	Indoor cat with outdoor access via cat flap	The cat is able to go outside and inside as it pleases at all hours day and night	Yes	Yes	No	Suburban	Næstved	Region Zealand
Cat 84	2 years	A neutered male	Domestic shorthair	Indoor cat with outdoor access via cat flap	The cat is able to go outside and inside as it pleases at all hours day and night	No	Yes	No	Suburban	Næstved	Region Zealand
Cat 85	4 years	A neutered female	Domestic shorthair	Indoor cat with outdoor access via cat flap	The cat is able to go outside and inside as it pleases at all hours day and night	Yes	Yes	No	Suburban	Fredericia	Region of Southern Denmark
Cat 86	4 years	A neutered male	Domestic shorthair	Indoor cat with outdoor access via cat flap	The cat is able to go outside and inside as it pleases at all hours day and night	Yes	Yes	No	Suburban	Fredericia	Region of Southern Denmark
Cat 87	3 years	A neutered female	Domestic shorthair	Indoor cat with outdoor access via cat flap	The cat is able to go outside and inside as it pleases at all hours day and night	Yes	Yes	No	Suburban	Fredericia	Region of Southern Denmark
Cat 88	1 year	A neutered female	Domestic shorthair	Indoor cat with outdoor access via cat flap	The cat is typically let out during the day and is indoors at night	No	Yes	Yes	Suburban	Norddjurs	Central Denmark Region
Cat 89	2 years	A neutered male	Domestic shorthair	Indoor cat with outdoor access via cat flap	The cat is typically let out during the day and is indoors at night	No	Yes	Yes	Suburban	Norddjurs	Central Denmark Region
Cat 90	8 years	An intact female	Domestic shorthair	Outdoor cat or farm cat which is rarely or never indoors		Yes	Yes	No	Rural	Aabenraa	Region of Southern Denmark
Cat 91	6 years	An intact female	Domestic shorthair	Outdoor cat or farm cat which is rarely or never indoors		Yes	Yes	No	Rural	Aabenraa	Region of Southern Denmark
Cat 92	9 years	A neutered female	Domestic shorthair	Indoor cat with outdoor access via window or door	The cat is typically let out during the day and is indoors at night	Yes	Yes	No	Rural	Vordingborg	Region Zealand
Cat 93	7 years	A neutered male	Maine Coon	Indoor cat with outdoor access via cat flap	The cat is able to go outside and inside as it pleases at all hours day and night	Yes	Yes	No	Suburban	Køge	Region Zealand
Cat 94	7 years	A neutered male	Domestic shorthair	Indoor cat with outdoor access via window or door	The cat is typically let out at night and is indoors during the day	Yes	Yes	Yes	Suburban	Assens	Region of Southern Denmark
Cat 95	7 years	A neutered male	Domestic shorthair	Indoor cat with outdoor access via cat flap	The cat is able to go outside and inside as it pleases at all hours day and night	No	Yes	No	Rural	Assens	Region of Southern Denmark
Cat 96	5 years	A neutered male	Domestic shorthair	Indoor cat with outdoor access via cat flap	The cat is able to go outside and inside as it pleases at all hours day and night	No	Yes	No	Rural	Assens	Region of Southern Denmark
Cat 97	9 years	A neutered female	Domestic shorthair	Indoor cat with outdoor access via cat flap	The cat is able to go outside and inside as it pleases at all hours day and night	Yes	Yes	No	Rural	Aabenraa	Region of Southern Denmark

## Sheet: Home range and time away
Cat ID	Recorded locations	Tracking period (days)	BBKDE 95% (ha)	Percent time away
Cat 01	2344	7	8.95	19.9608
Cat 02	2447	7	3.52	17.0452
Cat 03	1775	6.9	10.89	38.5019
Cat 04	1309	7	7.68	20.4177
Cat 05	2031	7	5.03	32.9329
Cat 06	1794	7	10.96	45.8319
Cat 07	2402	7	4.44	29.4631
Cat 08	3248	9.6	13.32	60.9104
Cat 09	2125	16.1	3.75	38.7278
Cat 10	548	6.6	1.28	9.26776
Cat 11	1180	7	1.96	5.31537
Cat 12	1555	7.1	1.2	3.54799
Cat 13	1552	7	4.8	29.2723
Cat 14	823	7.1	2.98	5.78147
Cat 15	891	6.9	4.27	8.47846
Cat 16	1879	7.1	4.96	14.4057
Cat 17	1697	7	19.21	87.6219
Cat 18	1185	7	5.23	8.68962
Cat 19	2717	7.1	36.8	55.685
Cat 20	2345	7	5.81	28.7818
Cat 21	2764	7.1	12.86	49.3873
Cat 22	1172	7	11.62	20.1836
Cat 23	1063	6.4	2.57	2.28533
Cat 24	4081	7.1	4.26	59.5468
Cat 25	1995	7	5.15	33.8079
Cat 26	1432	7.1	20.66	75.6821
Cat 27	1768	6.7	4.32	18.0652
Cat 28	1344	6.9	2.89	20.7475
Cat 29	4381	6	2.33	6.01708
Cat 30	1965	7	3.26	15.8959
Cat 31	1551	5.9	8.38	46.4788
Cat 32	752	7	6.34	22.916
Cat 33	1021	7	8.28	17.7824
Cat 34	1028	7	1.37	2.32547
Cat 35	1237	7	17.6	53.2086
Cat 36	813	7	2.05	7.41299
Cat 37	651	7	1.02	5.3749
Cat 38	1316	7	7.7	14.3892
Cat 39	1509	7	8.07	36.5531
Cat 40	1184	7	1.76	9.04243
Cat 41	1706	7	8.5	21.5516
Cat 42	1579	7	6.84	33.2687
Cat 43	756	10.5	8.96	17.2295
Cat 44	1395	5.9	5.28	10.4993
Cat 45	1037	7	4.54	17.7212
Cat 46	1858	7	6.76	38.6099
Cat 47	2134	7	7.26	16.4048
Cat 48	2306	7.1	6.53	26.6401
Cat 49	1509	7	10.13	60.3638
Cat 50	284	7	1.85	19.1209
Cat 51	623	7	3.59	12.8002
Cat 52	788	7	5.6	11.7716
Cat 53	1105	7	19.96	44.3142
Cat 54	721	7	10.44	24.3614
Cat 55	690	7	6.05	16.5691
Cat 56	9023	7	2.97	24.084
Cat 57	11085	7	2.1	12.1842
Cat 58	2390	7	1.64	9.47864
Cat 59	2437	7	23.26	80.3964
Cat 60	1961	7.1	6.32	18.2517
Cat 61	678	6.8	11.45	41.4799
Cat 62	904	7	7.21	57.5994
Cat 63	464	7	3.62	27.0202
Cat 64	1044	7	4.83	21.5126
Cat 65	623	7.1	1.42	2.2648
Cat 66	667	7.1	1.86	3.22684
Cat 67	567	6.9	0.97	2.00946
Cat 68	2022	6.5	2.53	2.55435
Cat 69	1406	6.5	3.24	5.62037
Cat 70	716	7.1	1.51	3.0726
Cat 71	909	7	105.9	49.4623
Cat 72	8703	7.1	11.44	28.1377
Cat 73	1429	7	5.25	26.9743
Cat 74	422	7.1	1.79	6.66946
Cat 75	1606	7	10.78	38.3638
Cat 76	1233	7	3.79	39.9485
Cat 77	930	7.1	91.25	54.9052
Cat 78	898	7	112.59	58.8598
Cat 79	1811	7	15.56	23.4259
Cat 80	1435	7.2	5	13.6367
Cat 81	880	7	6.27	21.741
Cat 82	464	7	3.45	19.6191
Cat 83	834	7	20.88	60.5922
Cat 84	815	7	7.51	24.3423
Cat 85	1161	7	1.01	4.4939
Cat 86	1280	7	3.22	12.7178
Cat 87	1814	7	1.74	2.05334
Cat 88	675	7	16.97	30.8181
Cat 89	589	7	13.99	24.8926
Cat 90	857	7	2.04	50.5181
Cat 91	905	7	1.97	31.8525
Cat 92	517	7.1	1.61	1.52879
Cat 93	1617	9.4	4.62	22.9342
Cat 94	2093	7	12.19	30.6325
Cat 95	1347	7	4.75	10.3911
Cat 96	508	6.9	12.12	28.8087
Cat 97	684	7	1.38	8.48102

## Sheet: Distance moved and rainfall
CatID	Daily rainfall (mm)	Daily distance moved (m)
1	2.4	3590.19
1	0.1	5932.37
1	1.3	3892.43
1	1.8	4597.59
1	0	5050.58
1	0	5176.61
2	2.4	4372.44
2	0.1	4696.58
2	1.3	5025.95
2	1.8	5042.8
2	0	4599.54
2	0	4684.19
3	1.3	2405.77
3	1.8	1445.95
3	0	6053.87
3	0	2802.68
3	0	6874.78
3	19.9	4654.5
4	0	3268.28
4	19.9	3077.27
4	3.2	3575.17
4	5.7	3733.41
4	11.6	3358.17
4	0.5	3178.82
5	0	6102.03
5	0	5544.03
5	19.9	1975.13
5	3.2	4401.75
5	5.7	2343.39
5	11.6	1758.76
6	3.2	1424.95
6	5.7	5246.81
6	11.6	5073.32
6	0.5	4259.06
6	0	4327.12
6	0.1	3460.75
7	3.2	5492.48
7	5.7	5673.21
7	11.6	3728.49
7	0.5	3586.88
7	0	5968.03
7	0.1	3673.93
8	3.2	1358.43
8	5.7	6322.98
8	11.6	7857.18
8	0.5	3660.94
8	0	1554.92
8	0.1	6593.99
8	0.6	2538.09
8	5	2202.05
10	2.9	819.718
10	1.1	863.745
10	0.5	1803.36
10	0.1	1008.66
10	0	322.561
10	0.1	642.008
10	3.2	405.517
11	0	3003.79
11	0.1	2283.5
11	0.6	2934.28
11	5	2012.16
11	9.1	561.647
11	41.3	859.748
12	0	1909.77
12	0.1	2837.32
12	0.6	2717.33
12	5	1561.31
12	9.1	996.365
12	41.3	1038.33
13	0.1	2762.56
13	0.6	1802.32
13	5	2260.05
13	9.1	1047.11
13	41.3	1896.79
13	3.3	2042.52
14	0	1220.41
14	0	946.551
14	0	2980.19
14	0	940.831
14	3	1215.44
15	0	972.861
15	0	957.294
15	0	77.2233
15	0	1217.49
15	0	2256.47
15	3	3204.38
16	0	3327.84
16	0	4929.64
16	0.2	4159.48
16	3.4	3554.66
16	8.2	3963.88
16	2.7	3579.66
17	0	5636.14
17	0	4739.77
17	0	5160.38
17	0.2	7217.72
17	3.4	5802.03
17	8.2	1980.66
18	0	4135.94
18	0	2364.98
18	0.3	817.442
18	1.5	2536.07
18	3.1	2731.53
18	0	2961.35
19	0	8611.83
19	0.6	5764.98
19	0.5	6045.19
19	2.1	6179.02
19	0.1	5971.6
19	0.1	4012.24
20	0	5844.11
20	0.4	4269.66
20	2.7	4303.67
20	0.9	6114.99
20	0.2	9125.41
20	0	2889.71
21	0	4777.85
21	0.1	6025.56
21	1.3	5482.23
21	0	1581.5
21	0	3572.43
21	10.3	1671.46
22	0.6	704.533
22	0.5	1836.36
22	2.1	3599.58
22	0.1	3641.31
22	0.1	947.659
22	9.5	1267.55
23	17.1	2689.78
23	0.5	2705.29
23	0	2228.77
23	0	1300.59
23	27.8	1394.23
23	0.1	1072.69
24	6.4	4855.22
24	1	1389.4
24	0	2635.37
24	0	3325.09
24	7.5	1075.37
24	1.8	623.717
25	9.7	2934.98
25	0.1	3664.78
25	0	2575.8
25	0	2410.27
25	18.2	2632.07
25	0.7	1133.35
26	0.9	3098.36
26	0	2159.91
26	0	3469.86
26	23.7	3067.84
26	1.5	4136.98
26	0.2	3369.1
27	0.6	3534.82
27	0	5622.21
27	0	6475.78
27	8	3890.37
27	0.3	2033.09
27	1.1	3826.6
28	0	765.239
28	11.3	2813.08
28	1	2113.02
28	1.6	3854.88
28	0	2155.15
28	0	666.791
29	12.9	3322.03
29	4.3	1552
29	1.8	4182.98
29	0	1023.16
29	0	1625.36
30	12.8	2064.46
30	0.3	2531.86
30	0	1728.91
30	0.1	733.402
30	0	1728.12
30	0	2638.35
31	10.7	3684.22
31	1.7	2585.26
31	1.8	3449.19
31	0	4752.76
31	0	3743.32
32	0	2246.75
32	5.1	2226.94
32	0.4	1149.46
32	0.1	2519.83
32	0	1872.08
32	2.9	1720.11
32	12.2	398.06
33	4.3	2803.95
33	0.2	4204.61
33	0	2592.54
33	0.1	2907.75
33	0.7	3570.29
33	7.9	1109.84
34	5.1	1487.46
34	0.1	1205.89
34	0.1	1327.28
34	0	1466.66
34	1.1	1458.28
34	8.7	780.742
35	3.9	3098.31
35	0.3	4167.77
35	0.2	653.206
35	0	2398.31
35	0.6	3943.07
35	4.5	2597.38
36	0.1	1558.6
36	0	2150.98
36	0	1565.44
36	4.8	1549.91
36	13.6	2375.85
36	14.3	1686.98
37	0	901.908
37	0	1423.21
37	4.8	886.656
37	13.6	1109.27
37	14.3	803.463
37	6.4	823.017
38	0	3332.1
38	0	2372.14
38	8.3	3107.37
38	0.2	2572.61
38	1.2	478.824
39	0	2992.17
39	0	2535.49
39	0.5	3246.85
39	12.3	3759.21
39	13	2228.83
39	6	2321.37
40	0	2070.24
40	0	1495.29
40	4.2	1221.94
40	0.1	1583.27
40	1.8	1311.11
40	8.8	2396.28
40	8.2	398.649
41	3.4	1845.02
41	3.4	3077.5
41	3.6	1157.7
41	3.1	1219.6
41	2.1	2015.27
41	2.1	2264.56
42	0.5	4183.25
42	2.6	3502.03
42	6	3021.21
42	5.3	2321.9
42	0.9	2963.44
42	2.6	3209.88
44	12.3	780.385
44	13	3279.91
44	6	1787.59
44	1.3	2711.12
44	1.5	3049.62
45	20.2	1807.77
45	0.2	2829.3
45	0	1998.58
45	0	1758.2
45	0	2530.91
45	0	1398.16
46	14.3	4743.08
46	0.5	7033.25
46	0.1	4606.89
46	0	5040.31
46	0	7010.86
46	0	5828.52
47	0	2776.84
47	0	462.942
47	0	5477.01
47	0.6	3584.82
47	1.3	4183.68
47	0	5989.09
48	0	6531.13
48	1	4151.85
48	5.3	2730.36
48	0.1	5246.85
48	2.1	4460.53
48	4.8	4250.13
49	43.2	1836.34
49	1.8	3696.65
49	1.8	8610.69
49	0.2	6097.09
49	0	436.402
49	0	257.353
50	1.4	577.947
50	6.1	242.992
50	0.7	859.38
50	0.4	122.822
50	1.9	609.644
50	6.1	138.874
51	7.4	1065.83
51	0.3	1336.39
51	9	1036.6
51	6.1	865.281
51	8.4	738.392
51	32	830.372
52	7.4	2679.12
52	0.3	2253.76
52	9	1344.12
52	6.1	1294.26
52	8.4	282.088
52	32	1383.22
53	0.3	3229.85
53	3.8	3133.39
53	11.9	3872.15
53	11.1	3060.69
53	5.5	2977.26
53	6.7	2610.42
54	0.3	2712.43
54	3.8	1761.53
54	11.9	1558.91
54	11.1	1635.92
54	5.5	1368.78
54	6.7	2032.82
55	0.3	2164.05
55	3.8	1389.88
55	11.9	1583.28
55	11.1	1914.6
55	5.5	1165.56
55	6.7	1030.86
56	1.9	5883.98
56	4.8	5634.33
56	7.4	3276.58
56	10.8	3729.69
56	16	4332.13
57	1.9	4980.49
57	4.8	6399.28
57	7.4	3080.4
58	3.5	2340.78
58	2.5	1953.5
58	2.7	943.984
58	13.6	1435.36
58	8.1	1064.51
58	0	1212.51
59	0.3	7454.83
59	6.4	3692.59
59	4.5	6016.2
59	0.8	3778.65
59	0.4	4858.4
59	0	5563.25
60	0.3	4206.15
60	6.4	2324.51
60	4.5	3856.73
60	0.8	3483.22
60	0.4	2700.95
60	0	2618.47
61	6.6	2096.17
61	9.9	1861
61	20.5	1606.3
61	2.2	3557.04
61	0.7	4481.75
61	0	4775.08
62	11.1	1223.18
62	0	1256.14
62	0	1908.11
62	0.3	2249.07
62	2.2	1921.37
62	0.5	1730.22
63	0	1185.8
63	0	2613.46
63	0.3	799.195
63	2.2	1103.52
63	0.5	1101.24
63	0	935.303
64	0	2236.85
64	0	1635.6
64	0.3	2952.27
64	2.2	3363.36
64	0.5	1660.46
64	0	1476.36
65	0	1312.22
65	0	655.199
65	1.1	990.642
65	0.5	1130.73
65	0	561.824
65	0	970.925
66	0	1595.25
66	0	1306.73
66	1.1	1324.73
66	0.5	931.382
66	0	1160.9
66	0	1024.49
67	0	1015.84
67	0	1332.31
67	1.1	763.187
67	0.5	330.633
67	0	998.364
67	0	1305.49
68	1.5	1447.9
68	1.7	1628.66
68	0.1	922.923
68	0.4	997.308
68	3.5	488.067
69	1.5	1342.16
69	1.7	1226.41
69	0.1	1400.54
69	0.4	604.676
69	3.5	734.818
70	1.6	1462.89
70	3.5	715.829
70	0	1284.9
70	0	531.899
70	1.3	654.265
70	0	1064.33
71	2.8	3054.35
71	0	7422.37
71	0.9	5376.32
71	1.4	4159.4
71	0.5	5136.88
71	7	2331.03
72	0	4656.68
72	0	5035.67
72	1.3	4642.12
72	0	5710.03
72	2.8	5217.9
72	5.7	3545.19
73	0	2852.88
73	0	3034.41
73	0.8	4998.76
73	0	4950.85
73	4.8	3529.04
73	3	3107.93
74	0	657.199
74	1.2	621.285
74	0.1	366.043
74	2.3	470.426
74	5.1	615.247
74	0.3	662.858
75	2.2	4249.42
75	1.2	3047.88
75	8.1	3459.72
75	17.5	4168.83
75	2.2	1971.2
75	1	2203.63
76	2.2	2006.51
76	1.2	2296.48
76	8.1	2981.96
76	17.5	2368.59
76	2.2	2296.04
76	1	2360.42
77	1	3375.15
77	2.6	4781.81
77	0.1	3804.7
77	1	2851.7
77	0.4	6771.53
77	0.1	5407.8
78	0	4158.66
78	0.4	5250.97
78	0	9364.79
78	0	7762.6
78	0	8695.15
78	4.2	4040.01
79	0.8	1456.67
79	0.3	3339.61
79	0	1839.9
79	0	3448.97
79	0.8	1594.05
79	1.8	3269.57
80	0.8	3624.82
80	0.3	2869.43
80	0	3045.54
80	0	2119.67
80	0.8	2323.2
80	1.8	3566.29
81	0.7	2800.14
81	0.3	2130.91
81	0	3163.21
81	0	2090.56
81	1.4	2036.54
81	1.4	963.025
82	0.7	885.311
82	0.3	738.425
82	0	1060.46
82	0	711.605
82	1.4	959.385
82	1.4	362.512
83	0.7	1975.96
83	0.3	6955.12
83	0	4769.62
83	0	4823.15
83	1.4	3337.94
83	1.4	3570.51
84	0.7	715.756
84	0.3	3679.69
84	0	3323
84	0	2076.83
84	1.4	1948.18
84	1.4	1929.63
85	0.3	2032.09
85	0	2153.15
85	2.7	1297.76
85	2.1	1414.95
85	0	1067.8
85	1.1	1426.77
86	0.3	2510.03
86	0	3112.62
86	2.7	3520.96
86	2.1	2352.65
86	0	3546.69
86	1.1	3187.06
87	0.3	2237.14
87	0	3635.41
87	2.7	2398.68
87	2.1	3604.25
87	0	4215.43
87	1.1	2700.61
88	3.1	2136.85
88	0.9	2477.19
88	0.1	3359.32
88	1.2	3071.22
88	1.6	2727.1
88	0.2	3560.19
89	3.1	2345.22
89	0.9	1776.55
89	0.1	2480.52
89	1.2	2116.1
89	1.6	1254.61
89	0.2	1836.55
90	4.3	1364.99
90	7.8	2081.15
90	0	2000.89
90	1.5	1584.47
90	1.7	1514.19
90	0.3	1859.52
91	4.3	1915.88
91	7.8	1510.87
91	0	766.036
91	1.5	896.798
91	1.7	1597.89
91	0.3	1065.63
92	0.8	815.976
92	0.1	483.378
92	0.1	505.203
92	0.2	391.66
92	1.9	1087.05
92	0.7	664.384
93	0	6015.21
93	0	5453.72
93	0.4	3165.61
93	2.5	4707.36
93	0.8	2764.61
93	5.5	1840.19
94	2.2	6051.25
94	2.7	6555.96
94	0.7	6626.93
94	4.9	6348.91
94	2.7	7188.57
94	1.1	5843.12
95	2.2	3779.59
95	2.7	2517.98
95	0.7	4402.01
95	4.9	2045.8
95	2.7	3350.54
95	1.1	2027.65
96	2.2	1334.59
96	2.7	1927.64
96	0.7	1459.91
96	4.9	3600.57
96	2.7	1596.9
96	1.1	2660.15
97	1.9	1115.62
97	4.2	1112.95
97	2.4	526.939
97	5.8	1047.99
97	0.8	1046.47
97	0.3	1365.74

## Sheet: Location errors of trackers
	Location errors of ten tracking devices placed in different environments for 48 hours
	Error mean and variation within devices
	GPS no.	Mean error (m)	Variance of error (m2)	St.dev. of error (m)
	1	9.07959	3.22118e-30	1.79477e-15
	2	27.5853	3.06875	1.75179
	3	24.5194	0.945575	0.972407
	4	7.20912	0.0451721	0.212537
	5	9.08502	11.2083	3.34787
	6	21.4627	12.2873	3.50532
	7	21.4627	2.89906e-29	5.3843e-15
	8	5.32679	3.22118e-30	1.79477e-15
	9	3.72153	9.86487e-30	3.14084e-15
	10	14.0828	1.28847e-29	3.58953e-15
	Error mean and variation between the 10 devices
			Mean variance (m2), within device	St.dev. (m), within device
	Mean error	13.0638	2.7555	1.65997
	St.dev. between devices	8.69683
